# Supplementary material for: A Comprehensive Map of Insulator Elements for the Drosophila Genome
Source: PLoS Genet. 2010 Jan 15;6(1):e1000814. doi: 10.1371/journal.pgen.1000814 (PMC2797089; doi:10.1371/journal.pgen.1000814)
Supplement: Table S1 — Binding sites of the insulator-associated proteins. The number of binding sites per factor at different confidence interval generated by MAT analysis. (0.02 MB XLS) [file pgen.1000814.s021.xls]

## Sheet: Sheet1
Protein	Number of peaks	Number of peaks
	(1% FDR)	(5% FDR)
CTCF_C	3153	3893
CTCF_N	2531	3326
CP190	6651	6808
BEAF-32	4708	5262
Su(Hw)-1	3419	3729
Su(Hw)-2	3629	3986
Mod(mdg4)	3059	3593
GAF	3903	4452
