# Supplementary material for: A Comprehensive Map of Insulator Elements for the Drosophila Genome
Source: PLoS Genet. 2010 Jan 15;6(1):e1000814. doi: 10.1371/journal.pgen.1000814 (PMC2797089; doi:10.1371/journal.pgen.1000814)
Supplement: Table S2 — Known insulators detected by our ChIP-chip analysis. For each published functional insulator element, an X mark indicates if they are associated with a peak for each factor identified in our ChIP-Chip experiments. (0.02 MB XLS) [file pgen.1000814.s022.xls]

## Sheet: Sheet1
	CTCF	CP190	BEAF-32	Su(Hw)	Mod(mdg4)	GAF
1A2 (AS-C)	x	x	-	x	x	-
SF1 (ANT-C)	x	x	-	-	-	-
scs (hsp70)	-	x	x	-	-	x
scs' (hsp70)	x	x	x	-	-	-
Mcp (BX-C)	x	x	-	-	x	-
Fab-7 (BX-C)	x	x	-	-	x	x
Fab-8 (BX-C)	x	x	-	-	x	x
eve prom.	-	-	-	-	-	x
